# Supplementary material for: Brachiopoda of Greece: an annotated checklist
Source: Biodivers Data J. 2016 Nov 1;(4):e8169. doi: 10.3897/BDJ.4.e8169 (PMC5136644; doi:10.3897/BDJ.4.e8169)
Supplement: Supplementary material 1 — Checklist of Brachiopoda of Greece [file biodiversity_data_journal-4-e8169-s001.xls]

## Sheet: Taxa
Taxon_Local_ID	Kingdom	Subkingdom	Phylum	Subphylum	Superclass	Class	Subclass	Superorder	Order	Suborder	Infraorder	Superfamily	Family	Subfamily	Tribe	Subtribe	Genus	Subgenus	Species	Subspecies	Variety	Form	Authorship	Nomenclature	Feeds on	Symbiotic with	Parasite of	Host of	Native Status	Conservation Status	Distribution	Horizon	Notes
1	Animalia		Brachiopoda			Craniata			Craniida				Craniidae				Novocrania		anomala				(Müller, 1776)								North Aegean, South Aegean, Levantine Sea, Ionian Sea	Pleistocene, Pliocene, Holocene	Recorded by: Logan (1979), Morri et al. (1999), Logan et al. (2002); Gerovasileiou et al. (2015); Habitat/Substrate: Caves, precoralligenous, coralligenous, bioconcretions, banks, boulders, muddy sand, coarse sand; Depth: 2-150 m
2	Animalia		Brachiopoda			Craniata			Craniida				Craniidae				Novocrania		turbinata				(Poli, 1795)	Doubtful species, may be a synonym of N. turbinata. See discussion.							South Aegean	Holocene	Recorded by: Logan & Long (2002); Habitat/Substrate: boulders; Depth: 65-150 m
3	Animalia		Brachiopoda			Rhynchonellata			Terebratulida				Cancellothyrididae				Terebratulina		retusa				(Linnaeus, 1758)								Levantine Sea	Pleistocene, Pliocene, Holocene	Recorded by: Logan (1979), Logan et al. (2002); Habitat/Substrate: Grey-yellow muds; Depth: 421 m; Remarks: Species record was based on a single poorly preserved specimen.
4	Animalia		Brachiopoda			Rhynchonellata			Terebratulida				Kraussinidae				Megerlia		truncata				(Linnaeus, 1767)								North Aegean, South Aegean, Levantine Sea, Ionian Sea	Pleistocene, Pliocene, Miocene, Holocene	Recorded by: Logan (1979), Logan et al. (2002), Taviani et al. (2011); Habitat/Substrate: Rocks, precoralligenous, coralligenous, bioconcretions, Madrepora-Lophelia rudstone, gravel, shells, detritus, coarse sand, muddy sand, mud; Depth: 29-762 m
5	Animalia		Brachiopoda			Rhynchonellata			Terebratulida				Megathyrididae				Argyrotheca		cistellula				(Wood, 1841)								South Aegean, Levantine Sea, Ionian Sea	Pleistocene, Holocene	Recorded by: Logan (1979), Logan et al. (2002); Habitat/Substrate: Caves and overhangs; Depth: 6-30 m
6	Animalia		Brachiopoda			Rhynchonellata			Terebratulida				Megathyrididae				Argyrotheca		cuneata				(Risso, 1826)								North Aegean, South Aegean, Levantine Sea, Ionian Sea	Pleistocene, Holocene	Recorded by: Logan (1979), Simboura et al. (1995), Morri et al. (1999), Logan et al. (2002); Habitat/Substrate: Caves, overhangs, offshore rocks, coralligenous, bioconcretions, banks, gravel, coarse sand, muddy sand; Depth: 2-210 m
7	Animalia		Brachiopoda			Rhynchonellata			Terebratulida				Megathyrididae				Joania		cordata				(Risso, 1826)								North Aegean, South Aegean, Levantine Sea, Ionian Sea	Pleistocene, Pliocene, Holocene	Recorded by: Logan (1979), Simboura et al. (1995), Morri et al. (1999), Logan et al. (2002); Habitat/Substrate: Caves, overhangs, offshore rocks, coralligenous, bioconcretions, banks, gravel, coarse sand; Depth: 6-135 m
8	Animalia		Brachiopoda			Rhynchonellata			Terebratulida				Megathyrididae				Megathiris		detruncata				(Gmelin, 1791)								North Aegean, South Aegean, Levantine Sea, Ionian Sea	Pleistocene, Pliocene, Holocene	Recorded by: Logan (1979), Morri et al. (1999), Logan et al. (2002); Antoniadou & Chintiroglou (2005); Habitat/Substrate: Caves, overhangs, rocky shoals, precoralligenous, coralligenous, bioconcretions, banks, gravel, mud; Depth: 10-180 m
9	Animalia		Brachiopoda			Rhynchonellata			Terebratulida				Platidiidae				Platidia		anomioides				(Scacchi & Philippi, 1844)								Levantine Sea	Holocene	Recorded by: Logan (1979), Logan et al. (2002); Habitat/Substrate: mud; Depth: 115-180 m
10	Animalia		Brachiopoda			Rhynchonellata			Terebratulida				Platidiidae				Platidia		davidsoni				(Eudes-Deslongchamp, 1885)	Doubtful species, may be a synonym of P. anomioides. See discussion.							North Aegean	Holocene	Recorded by: Logan (1979); Habitat/Substrate: Coralligenous; Depth: 108-112 m
11	Animalia		Brachiopoda			Rhynchonellata			Terebratulida				Terebratulidae				Gryphus		vitreus				(Born, 1778)								North Aegean, South Aegean, Levantine Sea, Ionian Sea	Holocene	Recorded by: Logan (1979), Logan et al. (2002), Taviani et al. (2011); Habitat/Substrate: Madrepora-Lophelia rudstone, Lophelia-Madrepora rubble, pelagic mudstone and wackestone, silty sand, sandy mud, mud; Depth: 130-2133 m
12	Animalia		Brachiopoda			Rhynchonellata			Terebratulida				Incertae familiae				Gwynia		capsula				(Jeffreys, 1859)								North Aegean Sea	Holocene	Recorded by: Antoniadou & Chintiroglou (2005); Habitat/Substrate: Hard substrate in sciaphilic algal community; Depth: 15-40 m

## Sheet: Materials
Taxon_Local_ID	typeStatus	catalogNumber	occurrenceDetails	occurrenceRemarks	recordNumber	recordedBy	individualID	individualCount	sex	lifeStage	reproductiveCondition	behavior	establishmentMeans	occurrenceStatus	preparations	disposition	otherCatalogNumbers	previousIdentifications	associatedMedia	associatedReferences	associatedOccurrences	associatedSequences	taxonID	scientificNameID	acceptedNameUsageID	parentNameUsageID	originalNameUsageID	nameAccordingToID	namePublishedInID	taxonConceptID	scientificName	acceptedNameUsage	parentNameUsage	originalNameUsage	nameAccordingTo	namePublishedIn	higherClassification	kingdom	phylum	class	order	family	genus	subgenus	specificEpithet	infraspecificEpithet	taxonRank	verbatimTaxonRank	scientificNameAuthorship
[truncated: 106 more columns]

## Sheet: ExternalLinks
Taxon_Local_ID	Link type	Link

## Sheet: SpeciesLists
Checklist of species of Brachiopoda of Greece
Gerovasileiou; Bailly, 2016
Published in Biodiversity Data Journal
Species names scattered or assembled in various ways
CAREFUL: Usage of formulas. If you copy-paste in another worksheet, paste only the values!
You can use Taxon_Local_ID to link with the worksheet Taxa, only for species.
Taxon_Local_ID	Kingdom	Phylum	Class	Order	Family	Genus	Species	Authorship	Rank	Combination	ScientificNameFull	ScientificName	Author	Year	AuthorYear	AuthorshipSimple	AphiaID in WoRMS
1	Animalia	Brachiopoda	Craniata	Craniida	Craniidae	Novocrania	anomala	(Müller, 1776)	species	new	Novocrania anomala (Müller, 1776)	Novocrania anomala	Müller	1776	Müller, 1776	(Müller, 1776)	235385
2	Animalia	Brachiopoda	Craniata	Craniida	Craniidae	Novocrania	turbinata	(Poli, 1795)	species	new	Novocrania turbinata (Poli, 1795)	Novocrania turbinata	Poli	1795	Poli, 1795	(Poli, 1795)	235386
3	Animalia	Brachiopoda	Rhynchonellata	Terebratulida	Cancellothyrididae	Terebratulina	retusa	(Linnaeus, 1758)	species	new	Terebratulina retusa (Linnaeus, 1758)	Terebratulina retusa	Linnaeus	1758	Linnaeus, 1758	(Linnaeus, 1758)	104055
4	Animalia	Brachiopoda	Rhynchonellata	Terebratulida	Kraussinidae	Megerlia	truncata	(Linnaeus, 1767)	species	new	Megerlia truncata (Linnaeus, 1767)	Megerlia truncata	Linnaeus	1767	Linnaeus, 1767	(Linnaeus, 1767)	104061
5	Animalia	Brachiopoda	Rhynchonellata	Terebratulida	Megathyrididae	Argyrotheca	cistellula	(Wood, 1841)	species	new	Argyrotheca cistellula (Wood, 1841)	Argyrotheca cistellula	Wood	1841	Wood, 1841	(Wood, 1841)	104063
6	Animalia	Brachiopoda	Rhynchonellata	Terebratulida	Megathyrididae	Argyrotheca	cuneata	(Risso, 1826)	species	new	Argyrotheca cuneata (Risso, 1826)	Argyrotheca cuneata	Risso	1826	Risso, 1826	(Risso, 1826)	104064
7	Animalia	Brachiopoda	Rhynchonellata	Terebratulida	Megathyrididae	Joania	cordata	(Risso, 1826)	species	new	Joania cordata (Risso, 1826)	Joania cordata	Risso	1826	Risso, 1826	(Risso, 1826)	380200
8	Animalia	Brachiopoda	Rhynchonellata	Terebratulida	Megathyrididae	Megathiris	detruncata	(Gmelin, 1791)	species	new	Megathiris detruncata (Gmelin, 1791)	Megathiris detruncata	Gmelin	1791	Gmelin, 1791	(Gmelin, 1791)	104065
9	Animalia	Brachiopoda	Rhynchonellata	Terebratulida	Platidiidae	Platidia	anomioides	(Scacchi & Philippi, 1844, in Philippi, 1844)	species	new	Platidia anomioides (Scacchi & Philippi, 1844, in Philippi, 1844)	Platidia anomioides	Scacchi & Philippi	1844	Scacchi & Philippi, 1844	(Scacchi & Philippi, 1844)	104066
10	Animalia	Brachiopoda	Rhynchonellata	Terebratulida	Terebratulidae	Platidia	davidsoni	(Eudes-Deslongchamp, 1885)	species	new	Platidia davidsoni (Eudes-Deslongchamp, 1885)	Platidia davidsoni	Scacchi & Philippi	1885	Scacchi & Philippi, 1885	(Scacchi & Philippi, 1885)	104067
11	Animalia	Brachiopoda	Rhynchonellata	Terebratulida	Terebratulidae	Gryphus	vitreus	(Born, 1778)	species	new	Gryphus vitreus (Born, 1778)	Gryphus vitreus	Born	1778	Born, 1778	(Born, 1778)	104068
12	Animalia	Brachiopoda	Rhynchonellata	Terebratulida	Incertae familiae	Gwynia	capsula	(Jeffreys, 1859)	species	new	Gwynia capsula (Jeffreys, 1859)	Gwynia capsula	Jeffreys	1859	Jeffreys, 1859	(Jeffreys, 1859)	104060

## Sheet: ClassificationLists
Checklist of species of Brachiopoda of Greece
Gerovasileiou; Bailly, 2016
Published in Biodiversity Data Journal
3 different layout for the list
CAREFUL: Usage of formulas. If you copy-paste in another worksheet, paste only the values!
You can use Taxon_Local_ID to link with the worksheet Taxa, only for species.
		Simple taxon list		1 col. Indented taxon list		Classification list with taxon # per rank								Additional info			List preparation
						Kingdom	Phylum	Class	Order	Family	Genus	Species
Rank		TaxonName		TaxonNameInd		1	1	2	2	7	9	12		AphiaID in WoRMS	Authorship		Taxon_Local_ID	Kingdom	Phylum	Class	Order	Family	Genus	Species	Authorship	Preparation fields
Kingdom		Animalia		Animalia		Animalia								2				Animalia								1	1	0	0	0	0	0	0		1	Kingdom		TRUE	TRUE	2	exact	Animalia		Animalia	2
Phylum		Brachiopoda		Brachiopoda			Brachiopoda							1803	Duméril, 1805			Animalia	Brachiopoda							2	1	1	0	0	0	0	0		2	Phylum		TRUE	TRUE	1803	exact	Brachiopoda	Duméril, 1805	Brachiopoda	1803
Class		Craniata		Craniata				Craniata						104019	Williams, Carlson, Brunton, Holmer & Popov, 1996			Animalia	Brachiopoda	Craniata						3	1	1	1	0	0	0	0		3	Class		TRUE	TRUE	104019	exact	Craniata	Williams, Carlson, Brunton, Holmer & Popov, 1996	Craniata	104019
Order		Craniida		Craniida					Craniida					104021	Waagen, 1885			Animalia	Brachiopoda	Craniata	Craniida					4	1	1	1	1	0	0	0		4	Order		TRUE	TRUE	104021	exact	Craniida	Waagen, 1885	Craniida	104021
Family		Craniidae		Craniidae						Craniidae				104024	Menke, 1828			Animalia	Brachiopoda	Craniata	Craniida	Craniidae				5	1	1	1	1	1	0	0		5	Family		TRUE	TRUE	104024	exact	Craniidae	Menke, 1828	Craniidae	104024
Genus		Novocrania		Novocrania							Novocrania			235165	Lee & Brunton, 2001			Animalia	Brachiopoda	Craniata	Craniida	Craniidae	Novocrania			6	1	1	1	1	1	1	0		6	Genus		TRUE	TRUE	235165	exact	Novocrania	Lee & Brunton, 2001	Novocrania	235165
Species		Novocrania anomala		Novocrania anomala								Novocrania anomala		235385	(O. F. Müller, 1776)		1	Animalia	Brachiopoda	Craniata	Craniida	Craniidae	Novocrania	anomala	(Müller, 1776)	7	1	1	1	1	1	1	1		7	Species		TRUE	TRUE	235385	exact	Novocrania anomala	(O. F. Müller, 1776)	Novocrania anomala	235385
Species		Novocrania turbinata		Novocrania turbinata								Novocrania turbinata		235386	(Poli, 1795)		2	Animalia	Brachiopoda	Craniata	Craniida	Craniidae	Novocrania	turbinata	(Poli, 1795)	7	1	1	1	1	1	1	1					TRUE	TRUE	235386	exact	Novocrania turbinata	(Poli, 1795)	Novocrania turbinata	235386
Class		Rhynchonellata		Rhynchonellata				Rhynchonellata						104020	Williams, Carlson, Brunton, Holmer & Popov, 1996			Animalia	Brachiopoda	Rhynchonellata						3	1	1	1	0	0	0	0					TRUE	TRUE	104020	exact	Rhynchonellata	Williams, Carlson, Brunton, Holmer & Popov, 1996	Rhynchonellata	104020
Order		Terebratulida		Terebratulida					Terebratulida					104023	Waagen, 1883			Animalia	Brachiopoda	Rhynchonellata	Terebratulida					4	1	1	1	1	0	0	0					TRUE	TRUE	104023	exact	Terebratulida	Waagen, 1883	Terebratulida	104023
Family		Cancellothyrididae		Cancellothyrididae						Cancellothyrididae				104028	Thomson, 1926			Animalia	Brachiopoda	Rhynchonellata	Terebratulida	Cancellothyrididae				5	1	1	1	1	1	0	0					TRUE	TRUE	104028	exact	Cancellothyrididae	Thomson, 1926	Cancellothyrididae	104028
Genus		Terebratulina		Terebratulina							Terebratulina			104040	d'Orbigny, 1847			Animalia	Brachiopoda	Rhynchonellata	Terebratulida	Cancellothyrididae	Terebratulina			6	1	1	1	1	1	1	0					TRUE	TRUE	104040	exact	Terebratulina	d'Orbigny, 1847	Terebratulina	104040
Species		Terebratulina retusa		Terebratulina retusa								Terebratulina retusa		104055	(Linnaeus, 1758)		3	Animalia	Brachiopoda	Rhynchonellata	Terebratulida	Cancellothyrididae	Terebratulina	retusa	(Linnaeus, 1758)	7	1	1	1	1	1	1	1					TRUE	TRUE	104055	exact	Terebratulina retusa	(Linnaeus, 1758)	Terebratulina retusa	104055
Family		Kraussinidae		Kraussinidae						Kraussinidae				104031	Dall, 1870			Animalia	Brachiopoda	Rhynchonellata	Terebratulida	Kraussinidae				5	1	1	1	1	1	0	0					TRUE	TRUE	104031	exact	Kraussinidae	Dall, 1870	Kraussinidae	104031
Genus		Megerlia		Megerlia							Megerlia			104045	King, 1850			Animalia	Brachiopoda	Rhynchonellata	Terebratulida	Kraussinidae	Megerlia			6	1	1	1	1	1	1	0					TRUE	TRUE	104045	exact	Megerlia	King, 1850	Megerlia	104045
Species		Megerlia truncata		Megerlia truncata								Megerlia truncata		104061	(Linnaeus, 1767)		4	Animalia	Brachiopoda	Rhynchonellata	Terebratulida	Kraussinidae	Megerlia	truncata	(Linnaeus, 1767)	7	1	1	1	1	1	1	1					TRUE	TRUE	104061	exact	Megerlia truncata	(Linnaeus, 1767)	Megerlia truncata	104061
Family		Megathyrididae		Megathyrididae						Megathyrididae				104033	Dall, 1870			Animalia	Brachiopoda	Rhynchonellata	Terebratulida	Megathyrididae				5	1	1	1	1	1	0	0					TRUE	TRUE	104033	exact	Megathyrididae	Dall, 1870	Megathyrididae	104033
Genus		Argyrotheca		Argyrotheca							Argyrotheca			104047	Dall, 1900			Animalia	Brachiopoda	Rhynchonellata	Terebratulida	Megathyrididae	Argyrotheca			6	1	1	1	1	1	1	0					TRUE	TRUE	104047	exact	Argyrotheca	Dall, 1900	Argyrotheca	104047
Species		Argyrotheca cistellula		Argyrotheca cistellula								Argyrotheca cistellula		104063	(Wood, 1841)		5	Animalia	Brachiopoda	Rhynchonellata	Terebratulida	Megathyrididae	Argyrotheca	cistellula	(Wood, 1841)	7	1	1	1	1	1	1	1					TRUE	TRUE	104063	exact	Argyrotheca cistellula	(Wood, 1841)	Argyrotheca cistellula	104063
Species		Argyrotheca cuneata		Argyrotheca cuneata								Argyrotheca cuneata		104064	(Risso, 1826)		6	Animalia	Brachiopoda	Rhynchonellata	Terebratulida	Megathyrididae	Argyrotheca	cuneata	(Risso, 1826)	7	1	1	1	1	1	1	1					TRUE	TRUE	104064	exact	Argyrotheca cuneata	(Risso, 1826)	Argyrotheca cuneata	104064
Genus		Joania		Joania							Joania			380199	Alvarez, Brunton & Long, 2008			Animalia	Brachiopoda	Rhynchonellata	Terebratulida	Megathyrididae	Joania			6	1	1	1	1	1	1	0					TRUE	TRUE	380199	exact	Joania	Alvarez, Brunton & Long, 2008	Joania	380199
Species		Joania cordata		Joania cordata								Joania cordata		380200	(Risso, 1826)		7	Animalia	Brachiopoda	Rhynchonellata	Terebratulida	Megathyrididae	Joania	cordata	(Risso, 1826)	7	1	1	1	1	1	1	1					TRUE	TRUE	380200	exact	Joania cordata	(Risso, 1826)	Joania cordata	380200
Genus		Megathiris		Megathiris							Megathiris			104048	d'Orbigny, 1847			Animalia	Brachiopoda	Rhynchonellata	Terebratulida	Megathyrididae	Megathiris			6	1	1	1	1	1	1	0					TRUE	TRUE	104048	exact	Megathiris	d'Orbigny, 1847	Megathiris	104048
Species		Megathiris detruncata		Megathiris detruncata								Megathiris detruncata		104065	(Gmelin, 1791)		8	Animalia	Brachiopoda	Rhynchonellata	Terebratulida	Megathyrididae	Megathiris	detruncata	(Gmelin, 1791)	7	1	1	1	1	1	1	1					TRUE	TRUE	104065	exact	Megathiris detruncata	(Gmelin, 1791)	Megathiris detruncata	104065
Family		Platidiidae		Platidiidae						Platidiidae				104034	Dall, 1870			Animalia	Brachiopoda	Rhynchonellata	Terebratulida	Platidiidae				5	1	1	1	1	1	0	0					TRUE	TRUE	104034	exact	Platidiidae	Dall, 1870	Platidiidae	104034
Genus		Platidia		Platidia							Platidia			104049	Costa, 1852			Animalia	Brachiopoda	Rhynchonellata	Terebratulida	Platidiidae	Platidia			6	1	1	1	1	1	1	0					TRUE	TRUE	104049	exact	Platidia	Costa, 1852	Platidia	104049
Species		Platidia anomioides		Platidia anomioides								Platidia anomioides		104066	(Scacchi & Philippi, 1844)		9	Animalia	Brachiopoda	Rhynchonellata	Terebratulida	Platidiidae	Platidia	anomioides	(Scacchi & Philippi, 1844, in Philippi, 1844)	7	1	1	1	1	1	1	1					TRUE	TRUE	104066	exact	Platidia anomioides	(Scacchi & Philippi, 1844)	Platidia anomioides	104066
Species		Platidia davidsoni		Platidia davidsoni								Platidia davidsoni		104067	(Eudes-Deslongchamp, 1885)			Animalia	Brachiopoda	Rhynchonellata	Terebratulida	Platidiidae	Platidia	davidsoni	(Eudes-Deslongchamp, 1885)	7	1	1	1	1	1	1	1					TRUE	TRUE	104067	exact	Platidia davidsoni	(Eudes-Deslongchamp, 1885)	Platidia davidsoni	104067
Family		Terebratulidae		Terebratulidae						Terebratulidae				104035	Gray, 1840			Animalia	Brachiopoda	Rhynchonellata	Terebratulida	Terebratulidae				5	1	1	1	1	1	0	0					TRUE	TRUE	104035	exact	Terebratulidae	Gray, 1840	Terebratulidae	104035
Genus		Gryphus		Gryphus							Gryphus			104050	Megerle von Mühlfeld, 1811			Animalia	Brachiopoda	Rhynchonellata	Terebratulida	Terebratulidae	Gryphus			6	1	1	1	1	1	1	0					TRUE	TRUE	104050	exact	Gryphus	Megerle von Mühlfeld, 1811	Gryphus	104050
Species		Gryphus vitreus		Gryphus vitreus								Gryphus vitreus		104068	(Born, 1778)		10	Animalia	Brachiopoda	Rhynchonellata	Terebratulida	Terebratulidae	Gryphus	vitreus	(Born, 1778)	7	1	1	1	1	1	1	1					TRUE	TRUE	104068	exact	Gryphus vitreus	(Born, 1778)	Gryphus vitreus	104068
Family		Incertae familiae		Incertae familiae						Incertae familiae								Animalia	Brachiopoda	Rhynchonellata	Terebratulida	Incertae familiae				5	1	1	1	1	1	0	0					FALSE	TRUE
Genus		Gwynia		Gwynia							Gwynia			104044	King, 1859			Animalia	Brachiopoda	Rhynchonellata	Terebratulida	Incertae familiae	Gwynia			6	1	1	1	1	1	1	0					TRUE	TRUE	104044	exact	Gwynia	King, 1859	Gwynia	104044
Species		Gwynia capsula		Gwynia capsula								Gwynia capsula		104060	(Jeffreys, 1859)		21	Animalia	Brachiopoda	Rhynchonellata	Terebratulida	Incertae familiae	Gwynia	capsula	(Jeffreys, 1859)	7	1	1	1	1	1	1	1					TRUE	TRUE	104060	exact	Gwynia capsula	(Jeffreys, 1859)	Gwynia capsula	104060
						Classification preparation
						Kingdom	Phylum	Class	Order	Family	Genus	Species
						Animalia	FALSE	FALSE	FALSE	FALSE	FALSE	FALSE
						FALSE	Brachiopoda	FALSE	FALSE	FALSE	FALSE	FALSE
						FALSE	FALSE	Craniata	FALSE	FALSE	FALSE	FALSE
						FALSE	FALSE	FALSE	Craniida	FALSE	FALSE	FALSE
						FALSE	FALSE	FALSE	FALSE	Craniidae	FALSE	FALSE
						FALSE	FALSE	FALSE	FALSE	FALSE	Novocrania	FALSE
						FALSE	FALSE	FALSE	FALSE	FALSE	FALSE	Novocrania anomala
						FALSE	FALSE	FALSE	FALSE	FALSE	FALSE	Novocrania turbinata
						FALSE	FALSE	Rhynchonellata	FALSE	FALSE	FALSE	FALSE
						FALSE	FALSE	FALSE	Terebratulida	FALSE	FALSE	FALSE
						FALSE	FALSE	FALSE	FALSE	Cancellothyrididae	FALSE	FALSE
						FALSE	FALSE	FALSE	FALSE	FALSE	Terebratulina	FALSE
						FALSE	FALSE	FALSE	FALSE	FALSE	FALSE	Terebratulina retusa
						FALSE	FALSE	FALSE	FALSE	Kraussinidae	FALSE	FALSE
						FALSE	FALSE	FALSE	FALSE	FALSE	Megerlia	FALSE
						FALSE	FALSE	FALSE	FALSE	FALSE	FALSE	Megerlia truncata
						FALSE	FALSE	FALSE	FALSE	Megathyrididae	FALSE	FALSE
						FALSE	FALSE	FALSE	FALSE	FALSE	Argyrotheca	FALSE
						FALSE	FALSE	FALSE	FALSE	FALSE	FALSE	Argyrotheca cistellula
						FALSE	FALSE	FALSE	FALSE	FALSE	FALSE	Argyrotheca cuneata
						FALSE	FALSE	FALSE	FALSE	FALSE	Joania	FALSE
						FALSE	FALSE	FALSE	FALSE	FALSE	FALSE	Joania cordata
						FALSE	FALSE	FALSE	FALSE	FALSE	Megathiris	FALSE
						FALSE	FALSE	FALSE	FALSE	FALSE	FALSE	Megathiris detruncata
						FALSE	FALSE	FALSE	FALSE	Platidiidae	FALSE	FALSE
						FALSE	FALSE	FALSE	FALSE	FALSE	Platidia	FALSE
						FALSE	FALSE	FALSE	FALSE	FALSE	FALSE	Platidia anomioides
						FALSE	FALSE	FALSE	FALSE	FALSE	FALSE	Platidia davidsoni
						FALSE	FALSE	FALSE	FALSE	Terebratulidae	FALSE	FALSE
						FALSE	FALSE	FALSE	FALSE	FALSE	Gryphus	FALSE
						FALSE	FALSE	FALSE	FALSE	FALSE	FALSE	Gryphus vitreus
						FALSE	FALSE	FALSE	FALSE	Incertae familiae	FALSE	FALSE
						FALSE	FALSE	FALSE	FALSE	FALSE	Gwynia	FALSE
						FALSE	FALSE	FALSE	FALSE	FALSE	FALSE	Gwynia capsula
